# Supplementary material
Source: Springer Nature journal article supplement (https://www.springermedizin.de/resource/supplementary/13063_2011_762_MOESM2_ESM.pdf/9618672)
Supplement: MOESM2 [file 9618672]

# FORA D15g

## Upper Arm cuff

Auto inflate with smart pumping function

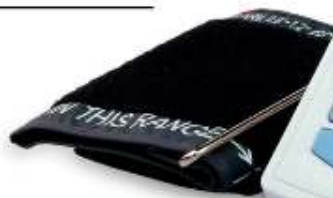

## 2-in-1 function

For both blood glucose and pressure measurement

## Code Card

- 0.7uL and 7 seconds

PC link via cable line or wireless transmission

Connect to software

## Memory for

352 readings

Easy to use: RF button to assist wireless transmission (b: Bluetooth)
